# Supplementary material for: Artificial and Natural Water Bodies Change in China, 2000–2020
Source: MDPI journal article supplement (doi:10.3390/w14111756), 2022-05-30
Supplement: s1 [file s1]

## Supplementary Table and Figure

**Table S1.** The coordinates of the center of gravity, moving direction and moving distance of artificial water bodies in China and river basins from 2000 to 2020.

| Region | Year | Lon(°)  | Lat(°) | Moving Direction | Moving Distance(km) |
|--------|------|---------|--------|------------------|---------------------|
| China  | 2000 | 113.198 | 34.087 | — —              | — —                 |
|        | 2005 | 113.256 | 34.713 | northeast        | 69.859              |
|        | 2010 | 113.275 | 34.610 | southeast        | 11.544              |
|        | 2015 | 113.074 | 34.785 | northwest        | 29.581              |
|        | 2020 | 113.201 | 34.657 | southeast        | 19.993              |
| HR     | 2000 | 116.463 | 39.014 | — —              | — —                 |
|        | 2005 | 116.493 | 38.821 | southeast        | 21.667              |
|        | 2010 | 116.583 | 38.981 | northeast        | 20.265              |
|        | 2015 | 116.441 | 38.940 | southwest        | 16.378              |
|        | 2020 | 116.517 | 38.998 | northeast        | 10.637              |
| YR     | 2000 | 107.905 | 37.020 | — —              | — —                 |
|        | 2005 | 108.114 | 36.741 | southeast        | 38.774              |
|        | 2010 | 107.921 | 36.924 | northwest        | 29.560              |
|        | 2015 | 107.726 | 37.118 | northwest        | 30.562              |
|        | 2020 | 107.819 | 36.937 | southeast        | 22.530              |
| SLR    | 2000 | 125.232 | 44.747 | — —              | — —                 |
|        | 2005 | 125.205 | 44.972 | northwest        | 25.230              |
|        | 2010 | 125.378 | 45.050 | southeast        | 21.053              |
|        | 2015 | 125.162 | 45.307 | northwest        | 37.306              |
|        | 2020 | 125.204 | 45.120 | southeast        | 21.217              |
| YTR    | 2000 | 112.671 | 29.807 | — —              | — —                 |
|        | 2005 | 112.064 | 29.724 | southwest        | 68.094              |
|        | 2010 | 112.263 | 29.773 | northeast        | 22.731              |
|        | 2015 | 111.949 | 29.643 | southwest        | 37.708              |
|        | 2020 | 111.720 | 29.710 | northwest        | 26.576              |
| SER    | 2000 | 119.293 | 27.639 | — —              | — —                 |
|        | 2005 | 119.180 | 27.931 | northwest        | 34.767              |
|        | 2010 | 119.256 | 27.768 | southeast        | 19.912              |
|        | 2015 | 119.185 | 27.916 | southeast        | 18.198              |
|        | 2020 | 119.317 | 27.759 | southeast        | 22.723              |
| HuR    | 2000 | 117.205 | 33.985 | — —              | — —                 |
|        | 2005 | 117.376 | 34.137 | northeast        | 25.354              |
|        | 2010 | 117.443 | 34.037 | southeast        | 13.409              |
|        | 2015 | 117.433 | 33.999 | southwest        | 4.343               |
|        | 2020 | 117.445 | 34.130 | northeast        | 14.548              |
| NWR    | 2000 | 86.574  | 41.315 | — —              | — —                 |
|        | 2005 | 86.329  | 41.301 | southwest        | 27.309              |
|        | 2010 | 85.507  | 41.489 | northwest        | 93.611              |

|     |      |         |        |           |         |
|-----|------|---------|--------|-----------|---------|
| SWR | 2015 | 85.456  | 41.564 | northwest | 10.126  |
|     | 2020 | 87.464  | 41.586 | northeast | 223.161 |
|     | 2000 | 97.124  | 26.544 | — —       | — —     |
|     | 2005 | 97.309  | 26.283 | southeast | 35.546  |
|     | 2010 | 97.999  | 26.144 | southeast | 78.156  |
|     | 2015 | 98.350  | 25.075 | southeast | 124.976 |
|     | 2020 | 98.594  | 25.332 | northeast | 39.351  |
|     | 2000 | 110.708 | 22.791 | — —       | — —     |
| PR  | 2005 | 110.802 | 22.833 | northeast | 11.389  |
|     | 2010 | 110.598 | 22.949 | northwest | 26.087  |
|     | 2015 | 110.668 | 22.855 | southeast | 12.980  |
|     | 2020 | 110.411 | 23.054 | northwest | 36.052  |

**Table S2.** List of acronyms in this article.

| Acronym    | Specific Meaning                                                                                       | Acronym     | Specific Meaning                                                                                              |
|------------|--------------------------------------------------------------------------------------------------------|-------------|---------------------------------------------------------------------------------------------------------------|
| SER        | Southeastern River Basins                                                                              | HR          | Haihe River Basin                                                                                             |
| HuR        | Huaihe River Basin                                                                                     | YR          | Yellow River Basin                                                                                            |
| NWR        | Northwest River Basin                                                                                  | SLR         | Songliao River Basin                                                                                          |
| SWR        | Southwest River Basins                                                                                 | YTR         | Yangtze River Basin                                                                                           |
| PR         | Pearl River Basin                                                                                      | GEE         | Google Earth Engine                                                                                           |
| BRA        | Bohai Rim Aquaculture                                                                                  | HBA         | Haizhou Bay Aquaculture                                                                                       |
| HDP        | Heihe Diversion Project                                                                                | TK          | Tankeng Reservoir                                                                                             |
| ASW        | Annual Surface Water data in km <sup>2</sup>                                                           | GSWE        | Global Surface Water Explorer                                                                                 |
| JRC        | European Commission's Joint Research Centre                                                            | China-IWRHR | Dam location data provided by the China Institute of Water Resources and Hydropower Research                  |
| China-LDRL | The China Open Data Set on Large Dams, Reservoirs and Lakes developed and freely shared by Wang et al. | GRanD v1.3  | The Global Reservoir and Dam Database curated and hosted by Global Dam Watch                                  |
| FAO        | Food and Agriculture Organization                                                                      | AQUASTAT    | A global georeferenced database of dams collected by FAO's Global Information System on Water and Agriculture |
| China-MSWD | Self-developed China Monthly Surface Water Dataset                                                     | China-ASWD  | The China Annual Surface Water Dataset                                                                        |

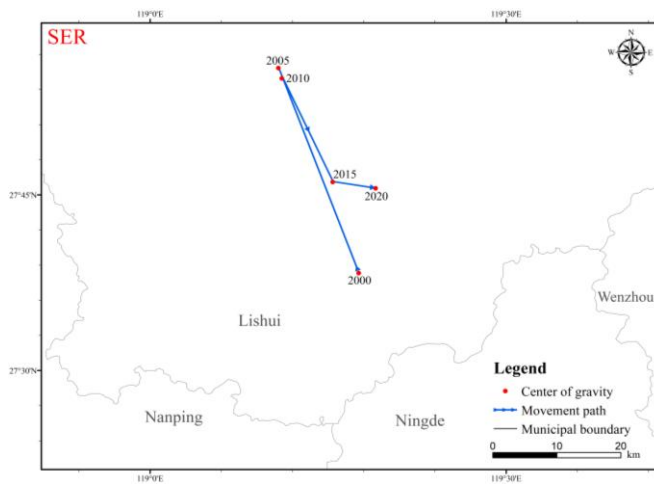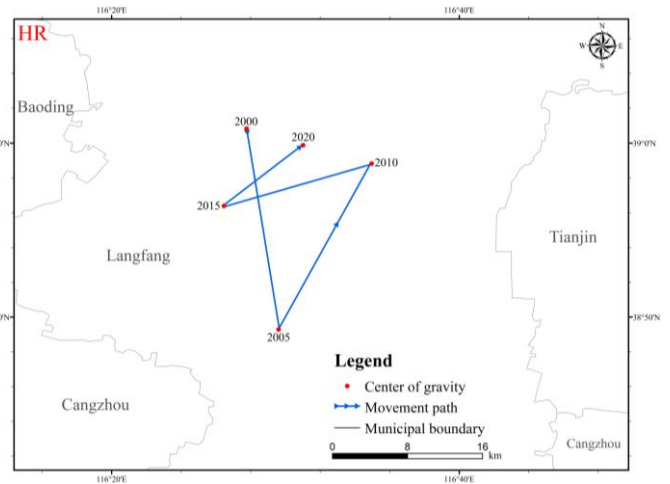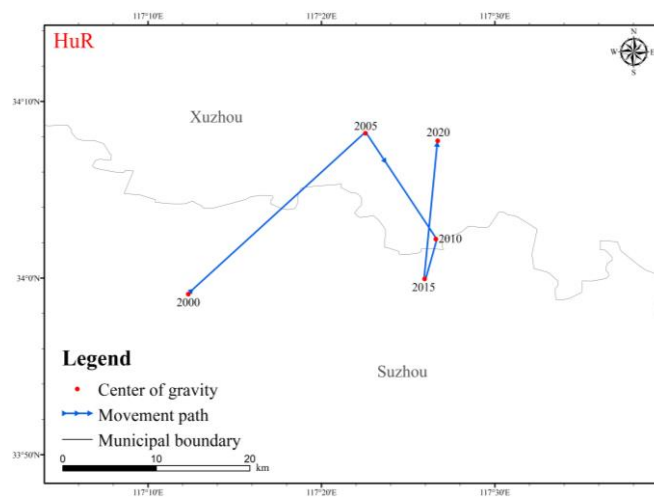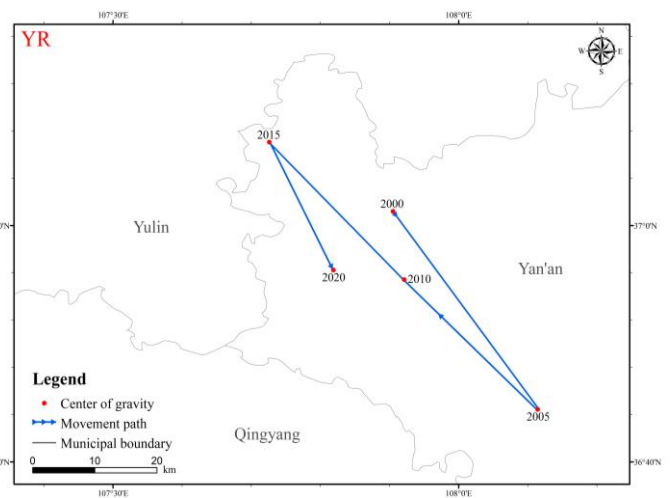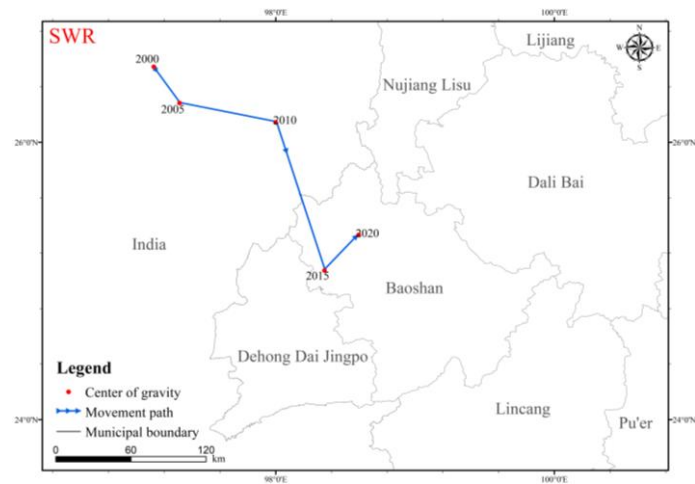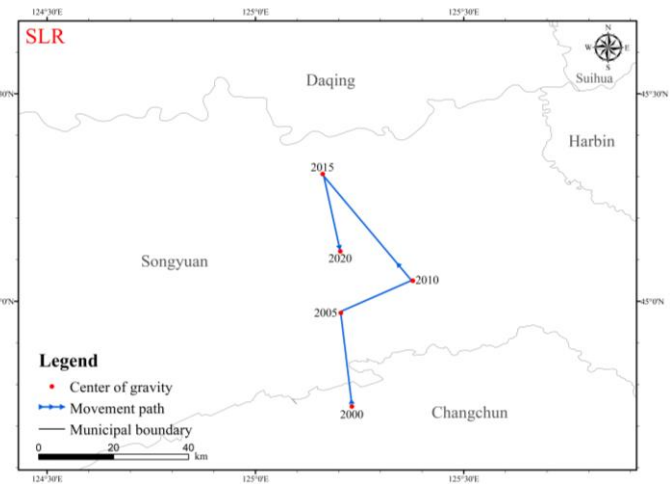

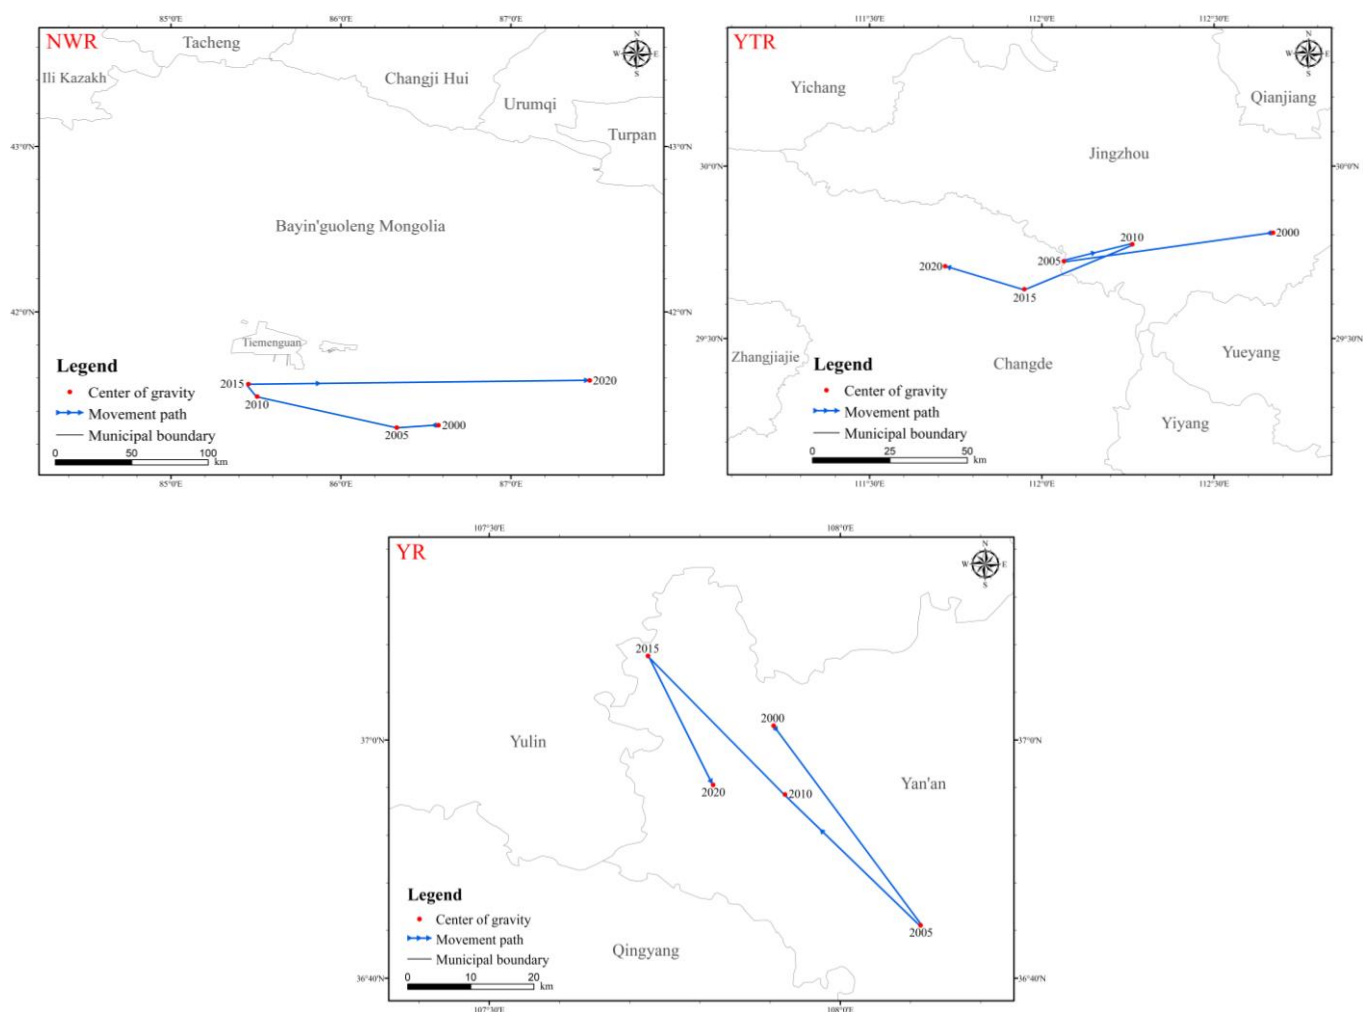

**Figure S1.** The movement trajectory of the center of gravity of artificial water bodies in different river basins in China from 2000 to 2020.
